# Supplementary material
Source: publisher figshare collection journal article supplement (https://acs.figshare.com/ndownloader/files/5336920)
Supplement: Supplementary file 1 [file 5336920]

  
data_complex1 
  
_audit_creation_method            SHELXL-97 
_chemical_name_systematic 
; 
 ? 
; 
_chemical_name_common             ? 
_chemical_melting_point           ? 
_chemical_formula_moiety          ? 
_chemical_formula_sum 
 'C18 H20 Cl2 Hg O2 S2' 
_chemical_formula_weight          603.95 
  
loop_ 
 _atom_type_symbol 
 _atom_type_description 
 _atom_type_scat_dispersion_real 
 _atom_type_scat_dispersion_imag 
 _atom_type_scat_source 
 'C'  'C'   0.0033   0.0016 
 'International Tables Vol C Tables 4.2.6.8 and 6.1.1.4' 
 'H'  'H'   0.0000   0.0000 
 'International Tables Vol C Tables 4.2.6.8 and 6.1.1.4' 
 'O'  'O'   0.0106   0.0060 
 'International Tables Vol C Tables 4.2.6.8 and 6.1.1.4' 
 'S'  'S'   0.1246   0.1234 
 'International Tables Vol C Tables 4.2.6.8 and 6.1.1.4' 
 'Cl'  'Cl'   0.1484   0.1585 
 'International Tables Vol C Tables 4.2.6.8 and 6.1.1.4' 
 'Hg'  'Hg'  -2.3894   9.2266 
 'International Tables Vol C Tables 4.2.6.8 and 6.1.1.4' 
  
_symmetry_cell_setting            Monoclinic 
_symmetry_space_group_name_H-M    P2(1)/n 
  
loop_ 
 _symmetry_equiv_pos_as_xyz 
 'x, y, z' 
 '-x+1/2, y+1/2, -z+1/2' 
 '-x, -y, -z' 
 'x-1/2, -y-1/2, z-1/2' 
  
_cell_length_a                    11.6016(5) 
_cell_length_b                    8.0991(4) 
_cell_length_c                    21.5623(10) 
_cell_angle_alpha                 90.00 
_cell_angle_beta                  97.9210(10) 
_cell_angle_gamma                 90.00 
_cell_volume                      2006.72(16) 
_cell_formula_units_Z             4 
_cell_measurement_temperature     173(2) 
_cell_measurement_reflns_used     7303 
_cell_measurement_theta_min       2.51 
_cell_measurement_theta_max       28.27 
  
_exptl_crystal_description        block 
_exptl_crystal_colour             colorless 
_exptl_crystal_size_max           0.40 
_exptl_crystal_size_mid           0.20 
_exptl_crystal_size_min           0.10 
_exptl_crystal_density_meas       ?
_exptl_crystal_density_diffrn     1.999 
_exptl_crystal_density_method     'not measured' 
_exptl_crystal_F_000              1160 
_exptl_absorpt_coefficient_mu     8.154 
_exptl_absorpt_correction_type    'empirical SADABS' 
_exptl_absorpt_correction_T_min   ? 
_exptl_absorpt_correction_T_max   ? 
_exptl_absorpt_process_details    
;
 Ratio of minimum to maximum apparent transmission:  0.543320
;
  
_exptl_special_details 
; 
 ? 
; 
  
_diffrn_ambient_temperature       173(2) 
_diffrn_radiation_wavelength      0.71073 
_diffrn_radiation_type            MoK\a 
_diffrn_radiation_source          'fine-focus sealed tube' 
_diffrn_radiation_monochromator   graphite 
_diffrn_measurement_device_type   'CCD area detector' 
_diffrn_measurement_method        'phi and omega scans' 
_diffrn_detector_area_resol_mean  ? 
_diffrn_standards_number          ? 
_diffrn_standards_interval_count  ? 
_diffrn_standards_interval_time   ? 
_diffrn_standards_decay_%         ? 
_diffrn_reflns_number             11997 
_diffrn_reflns_av_R_equivalents   0.0280 
_diffrn_reflns_av_sigmaI/netI     0.0316 
_diffrn_reflns_limit_h_min        -15 
_diffrn_reflns_limit_h_max        10 
_diffrn_reflns_limit_k_min        -10 
_diffrn_reflns_limit_k_max        10 
_diffrn_reflns_limit_l_min        -27 
_diffrn_reflns_limit_l_max        27 
_diffrn_reflns_theta_min          1.89 
_diffrn_reflns_theta_max          27.50 
_reflns_number_total              4502 
_reflns_number_gt                 3984 
_reflns_threshold_expression      >2sigma(I) 
  
_computing_data_collection        'Bruker SMART' 
_computing_cell_refinement        'Bruker SMART' 
_computing_data_reduction         'Bruker SAINT' 
_computing_structure_solution     'SHELXS-97 (Sheldrick, 1990)' 
_computing_structure_refinement   'SHELXL-97 (Sheldrick, 1997)' 
_computing_molecular_graphics     'Bruker SHELXTL' 
_computing_publication_material   'Bruker SHELXTL' 
  
_refine_special_details 
; 
 Refinement of F^2^ against ALL reflections.  The weighted R-factor wR and 
 goodness of fit S are based on F^2^, conventional R-factors R are based 
 on F, with F set to zero for negative F^2^. The threshold expression of 
 F^2^ > 2sigma(F^2^) is used only for calculating R-factors(gt) etc. and is 
 not relevant to the choice of reflections for refinement.  R-factors based 
 on F^2^ are statistically about twice as large as those based on F, and R- 
 factors based on ALL data will be even larger. 
; 
  
_refine_ls_structure_factor_coef  Fsqd 
_refine_ls_matrix_type            full 
_refine_ls_weighting_scheme       calc 
_refine_ls_weighting_details 
 'calc w=1/[\s^2^(Fo^2^)+(0.0253P)^2^+0.9968P] where P=(Fo^2^+2Fc^2^)/3' 
_atom_sites_solution_primary      direct 
_atom_sites_solution_secondary    difmap 
_atom_sites_solution_hydrogens    geom 
_refine_ls_hydrogen_treatment     constr 
_refine_ls_extinction_method      none 
_refine_ls_extinction_coef        ? 
_refine_ls_number_reflns          4502 
_refine_ls_number_parameters      226 
_refine_ls_number_restraints      0 
_refine_ls_R_factor_all           0.0273 
_refine_ls_R_factor_gt            0.0222 
_refine_ls_wR_factor_ref          0.0549 
_refine_ls_wR_factor_gt           0.0527 
_refine_ls_goodness_of_fit_ref    1.035 
_refine_ls_restrained_S_all       1.035 
_refine_ls_shift/su_max           0.002 
_refine_ls_shift/su_mean          0.000 
  
loop_ 
 _atom_site_label 
 _atom_site_type_symbol 
 _atom_site_fract_x 
 _atom_site_fract_y 
 _atom_site_fract_z 
 _atom_site_U_iso_or_equiv 
 _atom_site_adp_type 
 _atom_site_occupancy 
 _atom_site_symmetry_multiplicity 
 _atom_site_calc_flag 
 _atom_site_refinement_flags 
 _atom_site_disorder_assembly 
 _atom_site_disorder_group 
Hg1 Hg 0.903880(11) 0.188967(15) 0.030557(6) 0.02676(5) Uani 1 1 d . . . 
Cl1 Cl 0.97731(7) -0.08070(9) 0.07942(4) 0.02757(17) Uani 1 1 d . . . 
Cl2 Cl 0.71877(8) 0.19870(13) -0.03121(5) 0.0453(2) Uani 1 1 d . . . 
S1 S 0.84433(7) 0.34884(10) 0.13243(4) 0.02615(17) Uani 1 1 d . . . 
S2 S 1.08516(7) 0.37236(9) 0.04943(4) 0.02103(15) Uani 1 1 d . . . 
O1 O 1.2666(2) 0.2990(3) 0.20801(11) 0.0260(5) Uani 1 1 d . . . 
O2 O 1.0887(2) 0.4225(3) 0.27008(11) 0.0300(5) Uani 1 1 d . . . 
C1 C 1.2900(3) 0.3664(4) 0.26990(15) 0.0296(7) Uani 1 1 d . . . 
H1A H 1.3048 0.4865 0.2677 0.035 Uiso 1 1 calc R . . 
H1B H 1.3598 0.3133 0.2931 0.035 Uiso 1 1 calc R . . 
C2 C 1.1866(3) 0.3356(4) 0.30294(16) 0.0305(7) Uani 1 1 d . . . 
H2A H 1.1697 0.2159 0.3036 0.037 Uiso 1 1 calc R . . 
H2B H 1.2026 0.3753 0.3467 0.037 Uiso 1 1 calc R . . 
C3 C 0.9861(3) 0.3978(4) 0.29480(15) 0.0270(7) Uani 1 1 d . . . 
C4 C 0.9709(3) 0.4663(4) 0.35241(17) 0.0368(8) Uani 1 1 d . . . 
H4A H 1.0319 0.5277 0.3757 0.044 Uiso 1 1 calc R . . 
C5 C 0.8663(4) 0.4441(5) 0.37542(18) 0.0407(9) Uani 1 1 d . . . 
H5A H 0.8553 0.4902 0.4147 0.049 Uiso 1 1 calc R . . 
C6 C 0.7778(3) 0.3550(4) 0.34123(18) 0.0351(8) Uani 1 1 d . . . 
H6A H 0.7062 0.3399 0.3572 0.042 Uiso 1 1 calc R . . 
C7 C 0.7927(3) 0.2882(4) 0.28440(18) 0.0311(8) Uani 1 1 d . . . 
H7A H 0.7308 0.2284 0.2611 0.037 Uiso 1 1 calc R . . 
C8 C 0.8982(3) 0.3070(4) 0.26016(16) 0.0242(6) Uani 1 1 d . . . 
C9 C 0.9148(3) 0.2300(4) 0.19891(15) 0.0253(7) Uani 1 1 d . . . 
H9A H 0.8823 0.1168 0.1970 0.030 Uiso 1 1 calc R . . 
H9B H 0.9991 0.2216 0.1962 0.030 Uiso 1 1 calc R . . 
C10 C 0.9392(3) 0.5237(4) 0.12896(15) 0.0260(7) Uani 1 1 d . . . 
H10A H 0.9033 0.5967 0.0948 0.031 Uiso 1 1 calc R . . 
H10B H 0.9408 0.5860 0.1686 0.031 Uiso 1 1 calc R . . 
C11 C 1.0642(3) 0.4923(4) 0.11880(15) 0.0252(7) Uani 1 1 d . . . 
H11A H 1.1041 0.4343 0.1561 0.030 Uiso 1 1 calc R . . 
H11B H 1.1031 0.6004 0.1163 0.030 Uiso 1 1 calc R . . 
C12 C 1.1936(3) 0.2200(4) 0.08233(15) 0.0224(6) Uani 1 1 d . . . 
H12A H 1.1651 0.1638 0.1180 0.027 Uiso 1 1 calc R . . 
H12B H 1.2024 0.1355 0.0501 0.027 Uiso 1 1 calc R . . 
C13 C 1.3101(3) 0.2950(4) 0.10423(16) 0.0239(6) Uani 1 1 d . . . 
C14 C 1.3878(3) 0.3244(4) 0.06194(18) 0.0324(8) Uani 1 1 d . . . 
H14A H 1.3650 0.2993 0.0190 0.039 Uiso 1 1 calc R . . 
C15 C 1.4982(3) 0.3896(5) 0.0808(2) 0.0403(9) Uani 1 1 d . . . 
H15A H 1.5504 0.4082 0.0512 0.048 Uiso 1 1 calc R . . 
C16 C 1.5300(3) 0.4267(5) 0.1430(2) 0.0401(9) Uani 1 1 d . . . 
H16A H 1.6046 0.4732 0.1562 0.048 Uiso 1 1 calc R . . 
C17 C 1.4557(3) 0.3975(4) 0.18682(18) 0.0322(8) Uani 1 1 d . . . 
H17A H 1.4798 0.4215 0.2298 0.039 Uiso 1 1 calc R . . 
C18 C 1.3456(3) 0.3328(4) 0.16759(16) 0.0243(7) Uani 1 1 d . . . 
  
loop_ 
 _atom_site_aniso_label 
 _atom_site_aniso_U_11 
 _atom_site_aniso_U_22 
 _atom_site_aniso_U_33 
 _atom_site_aniso_U_23 
 _atom_site_aniso_U_13 
 _atom_site_aniso_U_12 
Hg1 0.02571(8) 0.02853(8) 0.02488(8) -0.00399(5) -0.00064(5) 0.00067(5) 
Cl1 0.0349(4) 0.0226(4) 0.0277(4) 0.0025(3) 0.0132(3) 0.0009(3) 
Cl2 0.0287(5) 0.0739(7) 0.0306(5) -0.0169(4) -0.0055(4) 0.0100(4) 
S1 0.0221(4) 0.0344(4) 0.0221(4) -0.0028(3) 0.0036(3) 0.0020(3) 
S2 0.0229(4) 0.0215(3) 0.0188(4) 0.0005(3) 0.0033(3) 0.0015(3) 
O1 0.0231(11) 0.0330(12) 0.0222(12) -0.0052(9) 0.0045(9) -0.0031(9) 
O2 0.0254(12) 0.0423(13) 0.0232(12) 0.0048(10) 0.0062(9) -0.0040(10) 
C1 0.0294(18) 0.0365(17) 0.0218(17) -0.0037(14) -0.0001(14) -0.0024(14) 
C2 0.0320(19) 0.0385(19) 0.0206(17) 0.0006(13) 0.0025(14) -0.0007(14) 
C3 0.0310(17) 0.0276(17) 0.0242(17) -0.0004(13) 0.0105(14) -0.0021(13) 
C4 0.044(2) 0.040(2) 0.0281(19) -0.0067(15) 0.0118(16) -0.0110(16) 
C5 0.056(2) 0.042(2) 0.030(2) -0.0056(16) 0.0246(18) 0.0015(18) 
C6 0.036(2) 0.0344(18) 0.039(2) 0.0062(15) 0.0229(17) 0.0029(15) 
C7 0.0300(18) 0.0297(18) 0.035(2) 0.0029(14) 0.0114(15) -0.0010(13) 
C8 0.0285(17) 0.0226(15) 0.0228(16) 0.0030(12) 0.0082(13) 0.0011(12) 
C9 0.0322(18) 0.0225(15) 0.0216(16) -0.0022(12) 0.0046(13) -0.0006(13) 
C10 0.0300(17) 0.0245(15) 0.0241(17) -0.0009(12) 0.0058(13) 0.0055(13) 
C11 0.0286(16) 0.0230(15) 0.0238(17) -0.0062(12) 0.0027(13) 0.0003(12) 
C12 0.0239(16) 0.0210(15) 0.0219(16) -0.0013(12) 0.0016(12) 0.0042(11) 
C13 0.0224(16) 0.0218(15) 0.0278(17) -0.0001(12) 0.0041(13) 0.0040(11) 
C14 0.0329(19) 0.0361(19) 0.030(2) 0.0054(14) 0.0121(15) 0.0057(14) 
C15 0.0311(19) 0.046(2) 0.048(2) 0.0050(18) 0.0208(18) 0.0021(16) 
C16 0.0231(17) 0.039(2) 0.059(3) -0.0038(18) 0.0112(17) -0.0048(15) 
C17 0.0250(17) 0.0357(19) 0.036(2) -0.0111(15) 0.0058(15) -0.0014(14) 
C18 0.0208(15) 0.0232(15) 0.0297(18) -0.0007(12) 0.0059(13) 0.0028(11) 
  
_geom_special_details 
; 
 All esds (except the esd in the dihedral angle between two l.s. planes) 
 are estimated using the full covariance matrix.  The cell esds are taken 
 into account individually in the estimation of esds in distances, angles 
 and torsion angles; correlations between esds in cell parameters are only 
 used when they are defined by crystal symmetry.  An approximate (isotropic) 
 treatment of cell esds is used for estimating esds involving l.s. planes. 
; 
  
loop_ 
 _geom_bond_atom_site_label_1 
 _geom_bond_atom_site_label_2 
 _geom_bond_distance 
 _geom_bond_site_symmetry_2 
 _geom_bond_publ_flag 
Hg1 Cl2 2.3671(9) . ? 
Hg1 Cl1 2.5216(8) . ? 
Hg1 S2 2.5611(8) . ? 
Hg1 S1 2.7197(8) . ? 
S1 C10 1.801(3) . ? 
S1 C9 1.824(3) . ? 
S2 C11 1.828(3) . ? 
S2 C12 1.834(3) . ? 
O1 C18 1.377(4) . ? 
O1 C1 1.432(4) . ? 
O2 C3 1.384(4) . ? 
O2 C2 1.437(4) . ? 
C1 C2 1.498(5) . ? 
C3 C8 1.389(5) . ? 
C3 C4 1.394(5) . ? 
C4 C5 1.385(5) . ? 
C5 C6 1.382(6) . ? 
C6 C7 1.372(5) . ? 
C7 C8 1.403(5) . ? 
C8 C9 1.497(4) . ? 
C10 C11 1.518(4) . ? 
C12 C13 1.498(4) . ? 
C13 C14 1.388(5) . ? 
C13 C18 1.405(5) . ? 
C14 C15 1.393(5) . ? 
C15 C16 1.376(6) . ? 
C16 C17 1.384(5) . ? 
C17 C18 1.390(5) . ? 
  
loop_ 
 _geom_angle_atom_site_label_1 
 _geom_angle_atom_site_label_2 
 _geom_angle_atom_site_label_3 
 _geom_angle 
 _geom_angle_site_symmetry_1 
 _geom_angle_site_symmetry_3 
 _geom_angle_publ_flag 
Cl2 Hg1 Cl1 119.47(3) . . ? 
Cl2 Hg1 S2 137.02(3) . . ? 
Cl1 Hg1 S2 102.31(3) . . ? 
Cl2 Hg1 S1 97.28(3) . . ? 
Cl1 Hg1 S1 100.59(3) . . ? 
S2 Hg1 S1 83.69(2) . . ? 
C10 S1 C9 103.74(15) . . ? 
C10 S1 Hg1 96.68(10) . . ? 
C9 S1 Hg1 104.32(10) . . ? 
C11 S2 C12 101.70(15) . . ? 
C11 S2 Hg1 103.84(11) . . ? 
C12 S2 Hg1 100.13(10) . . ? 
C18 O1 C1 117.2(3) . . ? 
C3 O2 C2 113.7(2) . . ? 
O1 C1 C2 108.6(3) . . ? 
O2 C2 C1 108.3(3) . . ? 
O2 C3 C8 118.5(3) . . ? 
O2 C3 C4 120.4(3) . . ? 
C8 C3 C4 121.1(3) . . ? 
C5 C4 C3 119.5(3) . . ? 
C6 C5 C4 120.0(3) . . ? 
C7 C6 C5 120.5(3) . . ? 
C6 C7 C8 120.9(3) . . ? 
C3 C8 C7 118.1(3) . . ? 
C3 C8 C9 121.4(3) . . ? 
C7 C8 C9 120.5(3) . . ? 
C8 C9 S1 112.0(2) . . ? 
C11 C10 S1 118.4(2) . . ? 
C10 C11 S2 116.4(2) . . ? 
C13 C12 S2 113.0(2) . . ? 
C14 C13 C18 118.2(3) . . ? 
C14 C13 C12 120.1(3) . . ? 
C18 C13 C12 121.7(3) . . ? 
C13 C14 C15 121.8(4) . . ? 
C16 C15 C14 118.7(3) . . ? 
C15 C16 C17 121.3(3) . . ? 
C16 C17 C18 119.6(3) . . ? 
O1 C18 C17 123.4(3) . . ? 
O1 C18 C13 116.2(3) . . ? 
C17 C18 C13 120.4(3) . . ? 
  
_diffrn_measured_fraction_theta_max    0.978 
_diffrn_reflns_theta_full              27.50 
_diffrn_measured_fraction_theta_full   0.978 
_refine_diff_density_max    0.763 
_refine_diff_density_min   -1.104 
_refine_diff_density_rms    0.108 
